# Supplementary material for: Dehydration of 2,3-Butanediol to 1,3-Butadiene and Methyl Ethyl Ketone: Modeling, Numerical Analysis and Validation Using Pilot-Scale Reactor Data
Source: MDPI journal article supplement (doi:10.3390/catal11080999), 2021-08-19
Supplement: s1 [file s1]

# Dehydration of 2,3-Butanediol to 1,3-Butadiene and Methyl Ethyl Ketone: Modeling, numerical analysis and validation using pilot-scale reactor data

Daesung Song<sup>a,\*</sup>, Sung Yong Cho<sup>b,\*</sup>, Thang Toan Vu<sup>a</sup>, Yen Hoang Phi Duong<sup>a</sup>, Eunkyu Kim<sup>a</sup>

<sup>a</sup>School of Chemical Engineering, Chonnam National University, 77 Yongbong-ro, Buk-gu, Gwangju 61186 Republic of Korea

<sup>b</sup>Department of Environment and Energy Engineering, Chonnam National University, 77 Yongbong-ro, Buk-gu, Gwangju 61186, Korea

Correspondence: Daesung Song (dssong@jnu.ac.kr) and Sung Yong Cho (syc@jnu.ac.kr)

## SUPPLEMENTARY MATERIAL

Table S1. Specification of the reactor.

|              | Property                     | Value                                    | Unit    |
|--------------|------------------------------|------------------------------------------|---------|
| Catalyst     | Type                         | Amorphous Calcium Phosphate (Ca/P = 1.3) |         |
|              | Average diameter             | 2.855                                    | mm      |
|              | Weight                       | 80                                       | g       |
|              | Density                      | 460.5                                    | kg/m3   |
|              | Heat capacity <sup>[1]</sup> | 995                                      | J/(kgK) |
|              | Conductivity                 | 0.251                                    | W/(mK)  |
|              | Porosity                     | 0.121                                    |         |
|              | Tortuosity <sup>[2-3]</sup>  | 1.73                                     |         |
| Tube         | Inner diameter               | 30                                       | mm      |
|              | Tube length                  | 1195                                     | mm      |
| Tube wall    | Thickness                    | 3.937                                    | mm      |
|              | Thermal conductivity         | 16                                       | W/(mK)  |
|              | Heat capacity                | 2000                                     | J/(kgK) |
| Catalyst bed | Length                       | 378                                      | mm      |
|              | Density                      | 299.4                                    | kg/m3   |
|              | Porosity                     | 0.35                                     |         |

Table S2. Reaction rate equations and kinetic parameters <sup>[4]</sup>.

|                         |                                                                                                                                                      |                                                        |                       |
|-------------------------|------------------------------------------------------------------------------------------------------------------------------------------------------|--------------------------------------------------------|-----------------------|
| Reaction rate equations | $r_i = k_i C_{react,i}^{n_i}$ $C_j = \frac{P_j}{RT}$ $k_i = k_{Tref,i} \exp\left(-\frac{E_i}{R} \left(\frac{1}{T} - \frac{1}{T_{ref}}\right)\right)$ |                                                        |                       |
|                         |                                                                                                                                                      | Unit                                                   | Value                 |
|                         |                                                                                                                                                      |                                                        |                       |
| Kinetic parameters      | $E_1$                                                                                                                                                | J/mol                                                  | $2.33 \times 10^5$    |
|                         | $E_2$                                                                                                                                                | J/mol                                                  | $2.82 \times 10^5$    |
|                         | $E_3$                                                                                                                                                | J/mol                                                  | $1.93 \times 10^5$    |
|                         | $E_4$                                                                                                                                                | J/mol                                                  | $1.66 \times 10^5$    |
|                         | $k_{Tref,1}$                                                                                                                                         | $\text{mol}^{(1-n1)} \text{m}^{3(n1-1)} \text{s}^{-1}$ | $7.45 \times 10^{-4}$ |
|                         | $k_{Tref,2}$                                                                                                                                         | $\text{mol}^{(1-n2)} \text{m}^{3(n2-1)} \text{s}^{-1}$ | $4.41 \times 10^{-4}$ |
|                         | $k_{Tref,3}$                                                                                                                                         | $\text{mol}^{(1-n3)} \text{m}^{3(n3-1)} \text{s}^{-1}$ | $6.44 \times 10^{-4}$ |
|                         | $k_{Tref,4}$                                                                                                                                         | $\text{mol}^{(1-n4)} \text{m}^{3(n4-1)} \text{s}^{-1}$ | $1.27 \times 10^{-4}$ |
|                         | $n1, n3, n4$                                                                                                                                         | -                                                      | 0.0187                |
|                         | $n2$                                                                                                                                                 | -                                                      | 0.146                 |

Table S3. Pertinent correlations and equations for the 1D heterogeneous model .

| Parameter                                                                            | Formular                                                                                                                                 |
|--------------------------------------------------------------------------------------|------------------------------------------------------------------------------------------------------------------------------------------|
| Mass and heat transfer coefficient between catalyst surface and fluid <sup>[5]</sup> | $Sh_p = Re_p Sc^{1/3} \max(1.66 Re_p^{-0.51}, 0.983 Re_p^{-0.41})$<br>$Nu_p = Re_p Pr^{1/3} \max(1.66 Re_p^{-0.51}, 0.983 Re_p^{-0.41})$ |
| Overall heat transfer coefficient <sup>[6]</sup>                                     | $\frac{1}{U} = \frac{1}{h_i} + \frac{\chi_w}{\lambda_m} \frac{d_t}{d_L}$                                                                 |

|                                              |                                                                                                                                                                                                            |
|----------------------------------------------|------------------------------------------------------------------------------------------------------------------------------------------------------------------------------------------------------------|
| Tube side heat transfer coefficient<br>[7-8] | $\frac{1}{h_i} = \frac{1}{\alpha_{ws}^e} + \frac{d_t/2}{3\lambda_{rs}^e} \frac{Bi + 3}{Bi + 4}$ $\alpha_{ws}^e = \alpha_{ws,0}^e + \alpha_{ws,d}^e$ $\lambda_{rs}^e = \lambda_{rs,0}^e + \lambda_{rs,d}^e$ |
| Effective diffusivity within a catalyst [9]  | $D_e = D_{mean}(\varepsilon_p/\tau)$                                                                                                                                                                       |
| The effectiveness factor [9]                 | $\eta_i = \int_0^{r_p} r_{si} dr / (r_p r_{si,s})$                                                                                                                                                         |

## Nomenclature

|             |                                                                                  |
|-------------|----------------------------------------------------------------------------------|
| $Bi$        | Biot number, m                                                                   |
| $C$         | mole concentration, mol/m <sup>3</sup>                                           |
| $\bar{d}_L$ | logarithmic mean diameter, m                                                     |
| $d_t$       | diameter of a reactor, m                                                         |
| $D_e$       | effective diffusivity within a catalyst, m <sup>2</sup> /s                       |
| $D_{mean}$  | mean diffusivity coefficient, m <sup>2</sup> /s                                  |
| $E$         | activation energy, J/mol                                                         |
| $h_i$       | tube inside heat transfer coefficient, W/m <sup>2</sup> K                        |
| $k$         | reaction rate constant, mol <sup>(1-n)</sup> m <sup>3(n-1)</sup> s <sup>-1</sup> |
| $kT_{ref}$  | transformed adsorption pre-exponential factor, m <sup>3</sup> /mol               |
| $n$         | reaction order                                                                   |
| $N_{up}$    | Nusselt number for fluid-solid heat transfer                                     |
| $P$         | pressure, Pa                                                                     |
| $r$         | reaction rate, mol/kg-cat s                                                      |
| $r_p$       | catalyst radius, m                                                               |
| $r_{si}$    | reaction rate in catalysts, mol/kg-cat s                                         |
| $r_{si,s}$  | reaction rate at the surface of the catalyst, mol/kg-cat s                       |
| $R$         | ideal gas law constant, J/mol K                                                  |
| $Re_p$      | Reynolds number for packed bed                                                   |
| $Sc$        | Schmidt number                                                                   |
| $Sh_p$      | Sherwood number for packed bed                                                   |
| $T$         | temperature, K                                                                   |
| $T_{ref}$   | reference temperature, K                                                         |
| $U$         | overall heat transfer coefficient, W/m <sup>2</sup> K                            |
| $x_w$       | tube wall thickness, m                                                           |

## Greek letters

|                    |                                                                                      |
|--------------------|--------------------------------------------------------------------------------------|
| $\alpha_{ws}^e$    | effective bed-wall heat transfer coefficient, W/m <sup>2</sup> K                     |
| $\alpha_{ws,0}^e$  | static term of the effective bed-wall heat transfer coefficient, W/m <sup>2</sup> K  |
| $\alpha_{ws,d}^e$  | dynamic term of the effective bed-wall heat transfer coefficient, W/m <sup>2</sup> K |
| $\varepsilon_p$    | catalyst porosity                                                                    |
| $\eta$             | effectiveness factor                                                                 |
| $\lambda_m$        | wall thermal conductivity, W/m K                                                     |
| $\lambda_{rs}^e$   | effective bed heat conductivity, W/m K                                               |
| $\lambda_{rs,0}^e$ | static term of effective bed heat, W/m K                                             |
| $\lambda_{rs,d}^e$ | dynamic term of effective bed heat conductivity, W/m K                               |
| $\tau$             | catalyst tortuosity                                                                  |
| Subscripts         |                                                                                      |
| $i$                | reaction $i$                                                                         |
| $j$                | species $j$                                                                          |
| react              | reactant                                                                             |
| rxn                | reaction                                                                             |

- [1] K.K.-. Kelley, (1960).
- [2] S.K. Bhatia, (1985).
- [3] R.C. Dykhuizen, W.H. Casey, *Geochimica et Cosmochimica Acta* 53 (1989) 2797-2805.
- [4] D. Song, *Industrial & Engineering Chemistry Research* 55 (2016) 11664-11671.
- [5] O. Hougen, *Ind. Eng. Chem.* 53 (1961) 509-528.
- [6] W.L. McCabe, J.C. Smith, P. Harriott, *Unit operations of chemical engineering*, McGraw Hill, Boston, 2001.
- [7] A. Dixon, *Chemical Engineering and Processing* 35 (1996) 323-331.
- [8] V. Specchia, G. Baldi, S. Sicardi, *Chemical Engineering Communications* 4 (1980) 361-380.
- [9] J.B. Riggs, *An introduction to numerical methods for chemical engineers*, Texas Tech University Press, Lubbock, Tex., USA, 1994.
